# Supplementary material
Source: PubMed Central journal article supplement (PMC4178630)
Supplement: AEM.01761-14_zam999105713so1.pdf [file AEM.01761-14_zam999105713so1.pdf]

**TABLE S1** Virulence gene targets, their encoded proteins and locations and sequence of the oligonucleotides used in the qPCR microarray

| <b>virulence gene targets</b> | <b>proteins encoded</b>                     | <b>location</b>                                                                    | <b>GenBank accession number</b> | <b>primer forward / primer reverse</b>                                   |
|-------------------------------|---------------------------------------------|------------------------------------------------------------------------------------|---------------------------------|--------------------------------------------------------------------------|
| <i>stx</i> - all variants     | Shiga toxin                                 | chromosome                                                                         | NC002695                        | TTTGTACTGTSACAGCWGAAGC<br>YTTACG /<br>CCCCAGTTCARWGTRAGRTC<br>MAC<br>RTC |
| <i>stx</i> <sub>2e</sub>      | Shiga toxin 2e variant                      | chromosome                                                                         | AB252836                        | AGGGAGCTACATCGGTATCC /<br>AACATCAAGCCCTCGTATACCT                         |
| <i>eae</i>                    | Intimin                                     | chromosome, LEE (locus of enterocyte effacement) of EHEC O157:H7 (strain EDL933)   | Z11541                          | CATTGATCAGGATTTTTCTGGTGA<br>TA /<br>CTCATGCGGAAATAGCCGTTA                |
| <i>eae</i> -alpha             | Intimin-alpha                               | chromosome, LEE (locus of enterocyte effacement) of EHEC O127:H7 (strain E2348/69) | M58154                          | GATACGAATGGCTATGCCAAAG /<br>CATCGCTAACACGGGCACTA                         |
| <i>eae</i> -beta              | Intimin-beta                                | chromosome, LEE (locus of enterocyte effacement) of EHEC O15:H- (strain RDEC-1)    | U60002                          | GGTGATAATCAGAGTGCGACATA<br>CA /<br>GGAATCAAATAACGTAACCTCGAG<br>TAT       |
| <i>eae</i> -gamma             | Intimin-gamma                               | chromosome, LEE (locus of enterocyte effacement) of EHEC O157:H7 (strain EDL933)   | Z11541                          | GACTGTTAGTGCGACAGTCAGTG<br>A /<br>TTGTTGTCAATTTTCAGTTCATCA<br>AA         |
| <i>eae</i> -epsilon           | Intimin-epsilon                             | chromosome, LEE (locus of enterocyte effacement) of EHEC O103:H2 (strain PMK5)     | AF116899                        | ATACCCAAATTGTGAAAACGGAT<br>A /<br>CACTAACAACAGCATTACCTGCA<br>A           |
| <i>eae</i> -theta             | Intimin-theta                               | chromosome, LEE (locus of enterocyte effacement) of EHEC O111:H- (strain 95NR1)    | AF025311                        | TGTTAAAGCACCTGAGGTTACATT<br>TT /<br>TCACCAGTAACGTTCTTACCAAG<br>AA        |
| <i>iha</i>                    | Iha, iron regulated gene A homolog, adhesin | chromosome, OI-43, OI-48                                                           | AF126104                        | AGTGGTACGGGTAAAACCG /<br>AGTATCAGCGTGTAACTGGC                            |
| <i>terE</i>                   | tellurite resistant gene                    | chromosome, OI-43, OI-48                                                           | CP003301                        | GCCGTTACCATCTATGATGC /<br>TGTAACCGCGCATGAAGCTG                           |
| <i>ureD</i>                   | urase transporter                           | chromosome, OI-43, OI-48                                                           | AE005174                        | GCAATAATTGACTCTGATTGCC /                                                 |

|                |                                                     |                    |          |                                                                       |
|----------------|-----------------------------------------------------|--------------------|----------|-----------------------------------------------------------------------|
|                |                                                     |                    |          | GCTGCTGCGGTAAAATTTACT                                                 |
| <i>espV</i>    | AvrA family effectors                               | chromosome, OI-44  | AE005174 | TCAGGTTCCCTCGTCTGATGCCGC /<br>CTGGTTCAGGCCTGGAGCAGTCC                 |
| <i>espK</i>    | non-LEE-encoded type III secretion system effectors | chromosome, OI-50  | AE005174 | GCAGRCATCAAAGCGAAATCAC<br>ACC /<br>TCGTTTGGTAACTGTGGCAGATAC<br>TC     |
| <i>espN</i>    | non-LEE-encoded type III secretion system effectors | chromosome, OI-50  | AE005174 | GACATATTTGTTTATGTCATCAGG<br>AGCGG /<br>CCTCAGGATATGGATGGCCTACT<br>GGC |
| <i>espX7</i>   | non-LEE-encoded type III secretion system effectors | chromosome, OI-50  | AE005174 | TGCTGAAGAATTGAATTACTCT /<br>TGTATCATCAAGCACTGCTCC                     |
| <i>espO1-1</i> | non-LEE-encoded type III secretion system effectors | chromosome, OI -50 | AE005174 | CATGTTGTTGATGTAAGTATGCAG<br>/<br>AAGTTCACAAGTACATTACCCGG              |
| <i>nleG5</i>   | non-LEE-encoded type III secretion system effectors | chromosome, OI -57 | AE005174 | AGACTATTCGTGGAGAAGCTCAA<br>G / TATTGAAGGCCAATCTGGATG                  |
| <i>nleG6-2</i> | non-LEE-encoded type III secretion system effectors | chromosome, OI -57 | AE005174 | ATATGCTCTCTATATGATAAGGAT<br>G /<br>AAAGTGACATTCGTCTTTTCTCAT<br>A      |
| <i>Z2096</i>   | putative gene marker for EHEC                       | chromosome, OI-57  | AE005174 | GCCGGGAACGATGAAGGTAAAA /<br>GCTTCTTTGCATGCCTCTCTGA                    |
| <i>Z2098</i>   | putative gene marker for EHEC                       | chromosome, OI-57  | AE005174 | CTGAAAAGAGCCAGAACGTGC/<br>TGCCTAAGATCATTACCCGGAC                      |
| <i>Z2099</i>   | putative gene marker for EHEC                       | chromosome, OI-57  | AE005174 | TAGCGGGACAATTGTCACGG /<br>GTCTTTCGGAGAAACATTCTGCC                     |
| <i>nleA</i>    | serine protease                                     | chromosome, OI-71  | AE005174 | AGATAACYCTAATACTAAATATG<br>CC/<br>GCCCAACCATTGCRCCGATATGA<br>GG       |
| <i>nleF</i>    | non-LEE-encoded type III secretion system effectors | chromosome, OI-71  | AE005174 | TGAGGTGAGAAATGAAAATACTG<br>ATG /<br>CTATCCCTGTCCTCTATCGTCATT<br>C     |
| <i>nleH1-2</i> | NleH                                                | chromosome, OI-71  | AE005174 | ACAAGAGAAAGTCATAGTGGTTG<br>/<br>AATCTCYCCCTTAGGCCATCCCA               |

|                   |                                                     |                                                     |              |                                                                             |
|-------------------|-----------------------------------------------------|-----------------------------------------------------|--------------|-----------------------------------------------------------------------------|
| <i>espM1</i>      | non-LEE-encoded type III secretion system effectors | chromosome, OI-71                                   | AE005174     | TCAGCTCTTTTGGTATCA /<br>CGCTAAATTTGTTAACATTAAAG                             |
| <i>espM2</i>      | IpgM                                                | chromosome, OI-108                                  | AE005174     | CAGCACAAAGTTCTATTAATCAT<br>GTRATAATGGGG /<br>ACTTGTCCGCAAGCAAGTTTGCTA<br>TG |
| <i>nleB</i>       | non-LEE-encoded type III secretion system effectors | chromosome, OI-122                                  | AE005174     | CATGTTGAAGGCTGGAASTTTGT /<br>CCGCTACAGGGCGATATGTT                           |
| <i>nleE</i>       | non-LEE-encoded type III secretion system effectors | chromosome, OI-122                                  | AE005174     | AGAAGCGTTTGAACCTATTTCCA /<br>TTGGGCGTTTTCCGGATAT                            |
| <i>efa1(lifA)</i> | Efa1 EHEC factor for adherence                      | chromosome, OI-122                                  | AE005174     | TTTTACCAGTTCATCATAACAGG /<br>CCATTATAAACATTTGCCAGACC                        |
| <i>ent/espL2</i>  | enterotoxin                                         | chromosome, OI-122                                  | AE005174     | TCCTGGATTATTTTCTGCATTTCA<br>/ ACTATTGCCAAGTACGCCACAA                        |
| <i>pagC</i>       | phoP-activated gene C product (PagC)                | chromosome, OI-122                                  | AE005174     | GGCTGATAATCATACGCTATCG /<br>ATCGATATTGCAGATTCCTCC                           |
| <i>lpfA-O157</i>  | long polar fimbriae                                 | chromosome, OI-141, OI-154                          | AE005174     | TACTGTCCGTTGACTCTCAG /<br>ACCAACCGCAGCAAATACAG                              |
| <i>lpfA-O113</i>  | long polar fimbriae                                 | chromosome, OI-154                                  | AY057066     | GCAGCCGTTTCGTTTTGATGGTACA<br>G / CCTGCTGTAAGCGGCGTACCC                      |
| <i>lpfA-O26</i>   | long polar fimbriae                                 | chromosome                                          | AB161111     | GCGCTGACCTCTACTTCCGTA /<br>GGCGTCAACAATCTCACCGGTG                           |
| <i>ecs1822</i>    | hypothetical protein, putative gene marker for EHEC | chromosome                                          | BA000007     | CCGTACAGCGTGATTCATCC /<br>TAGCGAAACGGGCAAGGTC                               |
| <i>ecs1763</i>    | hypothetical protein, putative gene marker for EHEC | chromosome                                          | BA000007     | TACTCTTGACCTTAGTACCGC /<br>TTTTGATTATCAGAACCATATAGC<br>CC                   |
| <i>irp2</i>       | iron responsible protein 2                          | chromosome, Yersinia-like high pathogenicity island | CP000468     | TGAACTCAAACGCCAGCAGCGC /<br>GGAACGCCCCAGATTGCTGG                            |
| <i>fyuA</i>       | pectin receptor                                     | chromosome, Yersinia-like high pathogenicity island | AFST01000010 | TCAGCGCGCCGGAATTAAGCG /<br>CCGGGCAAGACTCTGGGGAG                             |
| <i>ehaA</i>       | autotransporter, type V secretion system            | chromosome                                          | AE005174     | TAAGGGCGCTCACTCCATTAG /<br>TCACTGTCAGAAACCTGAATCAC                          |
| <i>hlyA</i>       | alpha hemolysin                                     | chromosome                                          | AE014075     | CAGTCCTCATTACCCAGCAAC /<br>TCAATGGGTCAAAGACTTGCTTC                          |
| <i>paa</i>        | porcine attaching and effacing associated adhesin   | chromosome or plasmid                               | U82533       | ACCTGGCGTGTGGCTGATAA/<br>GTTGAAGCAACTTTGCGGGATG                             |
| <i>cdtI</i>       | cytotoxic distending toxin                          | chromosome or plasmid                               | AY365042     | CAATAGTCGCCACAGGA/                                                          |

|                                 |                                                          |                       |          |                                                                     |
|---------------------------------|----------------------------------------------------------|-----------------------|----------|---------------------------------------------------------------------|
|                                 |                                                          |                       |          | ATAATCAAGAACACCACCAC                                                |
| <i>cdtIII</i>                   | cytolethal distending toxin                              | chromosome or plasmid | AY365042 | CCGATCAAAGCGGGTGGATAAT/<br>TGCTCCTGTTGTTGACGGTATG                   |
| <i>astA</i>                     | enteroaggregative <i>E. coli</i> heat stable enterotoxin | chromosome or plasmid | L11241   | ATCCGAAGGCCCGCATCCAG /<br>CGGCTTTGTAGTCCTTCCATGAC                   |
| <i>estIa</i> (STa)              | heat stable toxin                                        | plasmid               | M58746   | GCAAAATCCGTTTAACTAATCTCA<br>AA /<br>ACAGAAATAAAAATTGCCAACAT<br>TAGC |
| <i>elt</i> (LT)                 | heat labile toxin                                        | plasmid               | KF733765 | AAGCCATTGAAAGGATGAAGGA /<br>CTGATTGCCGCAATTGAATT                    |
| <i>sfp</i>                      | sorbitol-fermenting protein fimbriae                     | plasmid               | AF401292 | CTGTTGTCGTTTCTGAAGCG /<br>AGTTTGGTTGCAGAGCCAG                       |
| <i>bfp</i>                      | bundle-forming pilus                                     | plasmid               | AB024946 | AGGTGTGATGTTTTACTACCAG /<br>TAATTGCAGACGTTGCGCTC                    |
| <i>fasA</i> (F6, P987)          | F6 fimbrial adhesin                                      | plasmid               | U50547   | AGCAGTGCTTTCCTCTCTGTTCA /<br>TGCCTGGCTGGTGTGTTT                     |
| <i>fedA</i> (F18, F107)         | F18 fimbrial adhesin                                     | plasmid               | M61713   | GGCGGTTGTGCTTCCTTGT /<br>CCGTTACGGTTTTTCAGAGC                       |
| <i>fimF<sub>41a</sub></i> (F41) | F41 fimbrial adhesin                                     | plasmid               | X14354   | GCTGCATCAGCGGCAGTAT /<br>AACAGATGGTGATGTAATTTCCAC<br>CAC            |
| <i>cnf2</i>                     | cytotoxic necrotizing factor                             | Vir plasmid           | U01097   | CCTCGCTCGGCTCAACTTATT/<br>CGGTTTACCTTCTGCCTTCT                      |
| <i>orfA</i>                     | adhesin involved in diffuse adherence (AIDA)             | plasmid               | X65022   | CCGGCTATATCCTGGGAGTATCT/<br>TTTGCTTGTGCGGTAGACTG                    |
| <i>orfB</i>                     | adhesin involved in diffuse adherence (AIDA)             | plasmid               | X65022   | GGCTATGCTGAGAGCACCATTA/<br>TACTGGTTTCCGCCGGTATTT                    |
| <i>ecf1</i>                     | enzyme that enhance bacterial membrane structure         | plasmid O157          | AF043470 | TTTGGTGCTGATACGCCCTATG/<br>CTGTGCTGGCCTGAAGGATATT                   |
| <i>ecf2</i>                     | enzyme that enhance bacterial membrane structure         | plasmid O157          | AF043470 | CAGTCGAAACCCGGTGGGAATAA/<br>ACATCACCCGTAAGACCAGAAC                  |
| <i>ecf3</i>                     | enzyme that enhance bacterial membrane structure         | plasmid O157          | AF043470 | GTATGTCAGTCCCGCCAAATCT/<br>CGCAGGGACGGAATGAAGATAA                   |
| <i>ecf4</i>                     | enzyme that enhance bacterial membrane structure         | plasmid O157          | AF043470 | ACCACCGGATTTCTCTGGTTATG/<br>GCTGGAATGGTCTGGAGATTGT                  |
| <i>katP</i>                     | catalase/peroxidase                                      | plasmid O157          | X89017   | GAAGTCATATATCGCCGGTTGAA                                             |

|              |                                                                                     |              |          |                                                                                   |
|--------------|-------------------------------------------------------------------------------------|--------------|----------|-----------------------------------------------------------------------------------|
|              |                                                                                     |              |          | /                                                                                 |
| <i>ehxA</i>  | EHEC hemolysin                                                                      | plasmid O157 | AF074613 | GTCATTTTCAGGAACGGTGAGATC<br>CGTTAAGGAACAGGAGGTGTCAG<br>TA / ATCATGTTTTCCGCCAATGAG |
| <i>toxB</i>  | potential adhesin for adherence,                                                    | plasmid O157 | AB011549 | AGTATCAGTCACATAAAGTAGAC<br>/ GCATTRGGATCAATCCAGAG                                 |
| <i>etpD</i>  | EHEC type II secretion system,<br>transporting protein across the<br>outer membrane | plasmid O157 | CP001163 | TTGGATGACGGCGAAACTG /<br>AGATGATACGCTGTTGGGAG                                     |
| <i>stcE</i>  | metalloprotease, mucinase                                                           | plasmid O157 | AF074613 | CGGAGGTGGGGGAATTGTTA/<br>ATCACCATCCCATCCCCAAG                                     |
| <i>espP</i>  | serine protease autotransporter                                                     | plasmid O157 | CP001163 | ATGCCCCGTCAGCATCTG /<br>TCGACCGTCAGCGTATGG                                        |
| <i>eibG</i>  | immunoglobulin binding protein                                                      | plasmid O113 | AB255744 | CGGCAGAACAGACCGTATTG /<br>GCGAGTATTGGACTGAATAGC                                   |
| <i>epeA</i>  | EpeA, serine protease                                                               | plasmid O113 | AY258503 | GAGTCTTTCAGCCTTACCCG /<br>AGAACGCCAGTCAGGTTTCCA                                   |
| <i>saa</i>   | Saa, STEC agglutinating adhesion                                                    | plasmid O113 | AF399919 | ATGAACAGGCTATTGCCGC /<br>ATGTTGTGTATCCCATGAGG                                     |
| <i>subAB</i> | subtilase cytotoxin                                                                 | plasmid O113 | AF399919 | AGTGGCTTCCGCATCGG /<br>ATCATTACCCACTGCCGC                                         |
| <i>sab</i>   | autotransporter                                                                     | plasmid O113 | AF399919 | CTGCAGTTGACGCTCCTGTC /<br>CGCGAATACCGGGACTTATG                                    |

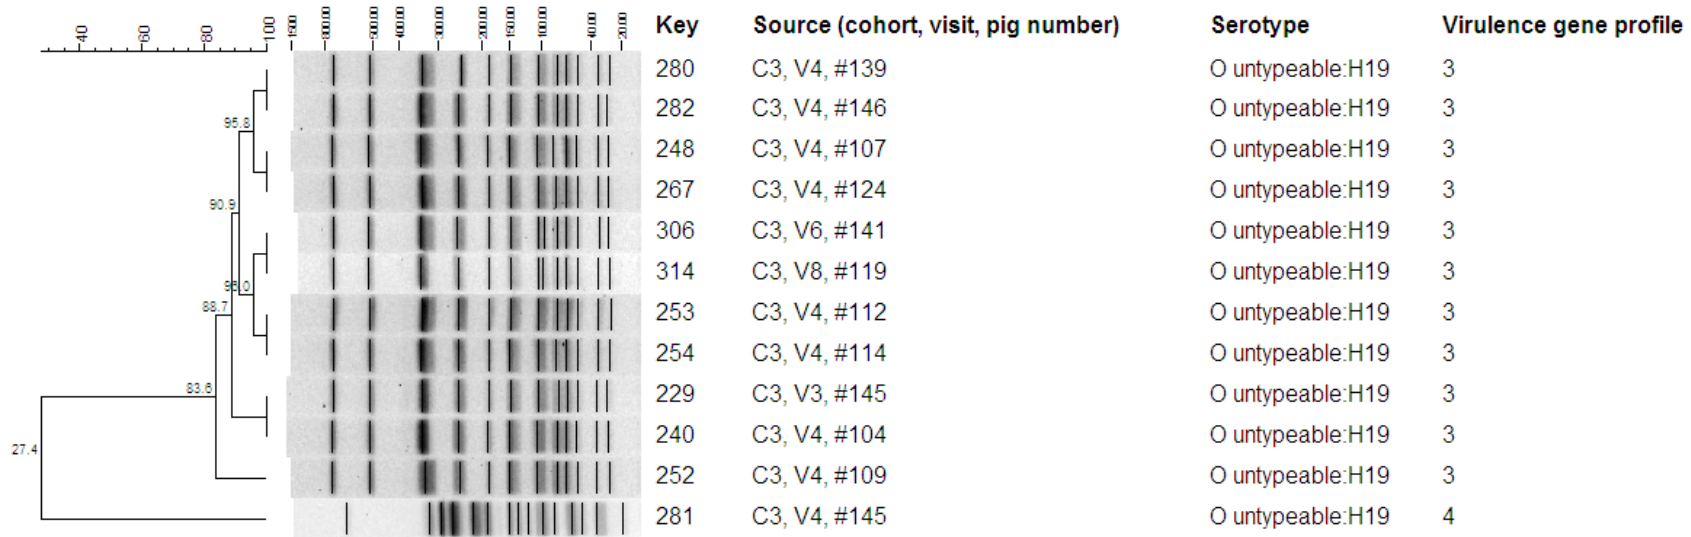

**FIG S1** PFGE analysis of swine O untypeable:H19 STEC strains. Key represents strain numbers. Source represents the strain from a pig in which cohort, which time of the eight farm visits, and the individual pig number.

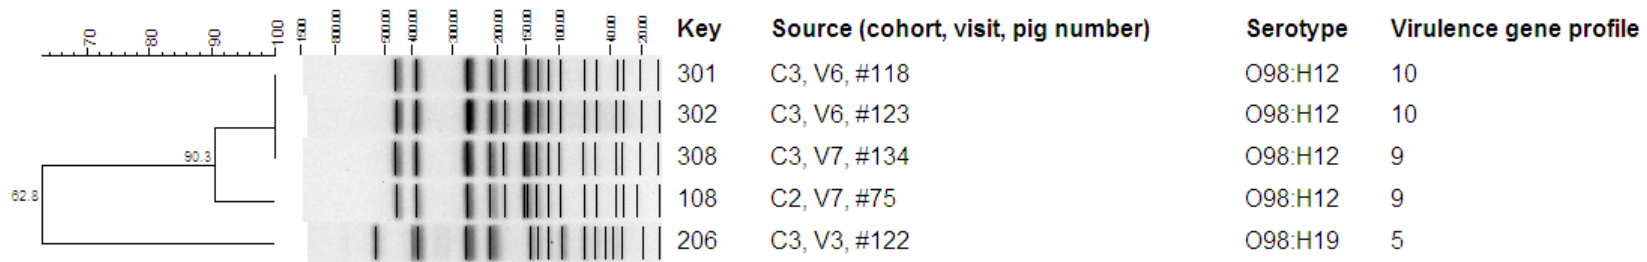

**FIG S2** PFGE analysis of swine O98 STEC strains. Key represents strain numbers. Source represents the strain from a pig in which cohort, which time of the eight farm visits, and the individual pig number.
